# Supplementary material
Source: ML conference proceedings conference paper supplement (https://openreview.net/forum?id=dyXNh5HLq3)
Supplement: supplementary_material [file attachment]

## Appendix

In this Appendix, we discuss how we factorize the hierarchical decision-making process in Section A. In Section B, we then detail the background and architecture for visually grounded task planning, visual planning with video diffusion, and action planning with inverse dynamics model. In Section C, we discuss the training and evaluation details for the different levels of planning in HiP and the corresponding training hyperparameters. Finally, in Section D, we showcase additional ablation studies comparing different approaches to enforce consistency across the levels of hierarchy.

### A Factorizing Hierarchical Decision-Making Process

We model the hierarchical decision-making process described in Section 2 with  $p_\Theta$  which can be factorized into the task distribution  $p_\theta$ , visual distribution  $p_\phi$ , and action distribution  $p_\psi$ .

$$p_\Theta(W, \{\tau_x^i\}, \{\tau_a^i\} | g, x_{1,1}) = \prod_{i=1}^N p_\theta(w_i | g, x_{i,1}, w_{<i}, \tau_x^{<i}, \tau_a^{<i}) \prod_{i=1}^N p_\phi(\tau_x^i | w_{\leq i}, x_{i,1}, g, \tau_x^{<i}, \tau_a^{<i}) \prod_{i=1}^N p_\psi(\tau_a^i | \tau_x^{\leq i}, w_{\leq i}, x_{i,1}, g, \tau_a^{<i})$$

Here, given random variables  $Y^i$ ,  $Y^{<i}$  and  $Y^{\leq i}$  represents  $\{Y^1, \dots, Y^{i-1}\}$  and  $\{Y^1, \dots, Y^i\}$  respectively. Now, we apply Markov assumption: Given current observation  $x_{i,1}$ , future variables  $(w_i, \tau_x^i, \tau_a^i)$  and past variables  $(w_j, \tau_x^j, \tau_a^j \ \forall j < i)$  are conditionally independent.

$$p_\Theta(W, \{\tau_x^i\}, \{\tau_a^i\} | g, x_{1,1}) = \prod_{i=1}^N p_\theta(w_i | g, x_{i,1}) \prod_{i=1}^N p_\phi(\tau_x^i | w_i, x_{i,1}, g) \prod_{i=1}^N p_\psi(\tau_a^i | \tau_x^i, w_i, x_{i,1}, g)$$

We model task distribution  $p_\theta$  with a large language model (LLM) which is independent of observation  $x_{i,1}$ . Since the image trajectory  $\tau_x^i = \{x_{i,1:T}\}$  describes a physically plausible plan for achieving subgoal  $w_i$  from observation  $x_{i,1}$ , it is conditionally independent of goal  $g$  given subgoal  $w_i$  and observation  $x_{i,1}$ . Furthermore, we assume that an action  $a_{i,t}$  can be recovered from observation at the same timestep  $x_{i,t}$  and the next timestep  $x_{i,t+1}$ . Thus, we can write the factorization as

$$p_\Theta(W, \{\tau_x^i\}, \{\tau_a^i\} | g, x_{1,1}) = \left( \prod_{i=1}^N p_\theta(w_i | g) \right) \left( \prod_{i=1}^N p_\phi(\tau_x^i | w_i, x_{i,1}) \right) \left( \prod_{i=1}^N \prod_{t=1}^{T-1} p_\psi(a_{i,t} | x_{i,t}, x_{i,t+1}) \right)$$

### B Background and Architecture

#### B.1 Task Planning

**Background on Density Ratio Estimation.** Let  $p$  and  $q$  be two densities, such that  $q$  is absolutely continuous with respect to  $p$ , denoted as  $q \ll p$  i.e.  $q(x) > 0$  wherever  $p(x) > 0$ . Then, their ratio is defined as  $r(x) = p(x)/q(x)$  over the support of  $p$ . We can estimate this density ratio  $r(x)$  by training a binary classifier to distinguish between samples from  $p$  and  $q$  [44, 14, 17]. More recent work [43] has shown one can introduce auxiliary densities  $\{m_i\}_{i=1}^M$  and train a multi-class classifier to distinguish samples between  $M$  classes to learn a better-calibrated and more accurate density ratio estimator. Once trained, the log density ratio can be estimated by  $\log r(x) = \hat{h}_p(x) - \hat{h}_q(x)$ , where  $\hat{h}_i(x)$  is the unnormalized log probability of the input sample under the  $i^{th}$  density, parameterized by the model.

**Learning a Classifier to Visually Ground Task Planning.** We estimate the density ratio  $\frac{p(x_{i,1}|w_i,g)}{p(x_{i,1}|g)}$  with a multi-class classifier  $f_\phi(x_{i,1}, \{w_j\}, g)$  trained to distinguish samples amongst the conditional distributions  $p(x_{i,1}|w_i, g), \dots, p(x_{i,1}|w_M, g)$  and the marginal distribution  $p(x_{i,1}|g)$ . Upon convergence, the classifier learns to assign high scores to  $(x_{i,1}, w_i, g)$  if  $w_i$  is the subgoal corresponding to the observation  $x_{i,1}$  and task  $g$  and low scores otherwise.

**Architecture.** We parameterize  $f_\phi$  as a 4-layer multi-layer perceptron (MLP) on top of an ImageNet-pretrained vision encoder (ResNet-18 [15]) and a frozen pretrained language encoder (Flan-T5-Base [8]). The vision encoder encodes the observation  $x_{i,1}$ , and the text encoder encodes the subgoals

469  $w_j$  and the goal  $g$ . The encoded observation, the encoded subgoals, and the encoded goal are  
 470 concatenated, and passed through a MLP with 3 hidden layers of sizes 512, 256, and 128. The  
 471 output dimension for MLP (i.e., number of classes for multi-classification)  $M$  is 6 for paint-block  
 472 environment and 5 for object-arrange environment.

473 **Choice of Large Language Model.** We use GPT3.5-turbo [36] as our large language model.

## 474 B.2 Visual Planning

475 **Background.** Diffusion Probabilistic Models [41, 20] learn the data distribution  $h(\mathbf{x})$  from a  
 476 dataset  $\mathcal{D} := \{\mathbf{x}^i\}$ . The data-generating procedure involves a predefined forward noising process  
 477  $q(\mathbf{x}_{k+1}|\mathbf{x}_k)$  and a trainable reverse process  $p_\phi(\mathbf{x}_{k-1}|\mathbf{x}_k)$ , both parameterized as conditional Gaussian  
 478 distributions. Here,  $\mathbf{x}_0 := \mathbf{x}$  is a sample,  $\mathbf{x}_1, \mathbf{x}_2, \dots, \mathbf{x}_{K-1}$  are the latents, and  $\mathbf{x}_K \sim \mathcal{N}(\mathbf{0}, \mathbf{I})$  for a  
 479 sufficiently large  $K$ . Starting with Gaussian noise, samples are then iteratively generated through a  
 480 series of “denoising” steps. Although a tractable variational lower-bound on  $\log p_\phi$  can be optimized  
 481 to train diffusion models, Ho et al. [20] propose a simplified surrogate loss:

$$\mathcal{L}_{\text{denoise}}(\theta) := \mathbb{E}_{k \sim [1, K], \mathbf{x}_0 \sim h, \epsilon \sim \mathcal{N}(\mathbf{0}, \mathbf{I})} [\|\epsilon - \epsilon_\phi(\mathbf{x}_k, k)\|^2]$$

482 The predicted noise  $\epsilon_\theta(\mathbf{x}_k, k)$ , parameterized with a deep neural network, estimates the noise  $\epsilon \sim$   
 483  $\mathcal{N}(\mathbf{0}, \mathbf{I})$  added to the dataset sample  $\mathbf{x}_0$  to produce noisy  $\mathbf{x}_k$ .

484 **Guiding Diffusion Models with Text.** Diffusion models are most notable for synthesizing high-  
 485 quality images [39, 34] and videos [21, 49] from text descriptions. Modeling the conditional data  
 486 distribution  $q(\mathbf{x}|\mathbf{y})$  makes it possible to generate samples satisfying the text description  $\mathbf{y}$ . To enable  
 487 conditional data generation with diffusion, Ho and Salimans [19] modified the original training setup  
 488 to learn both a conditional  $\epsilon_\phi(\mathbf{x}_k, \mathbf{y}, k)$  and an unconditional  $\epsilon_\phi(\mathbf{x}_k, k)$  model for the noise. The  
 489 unconditional noise is represented, in practice, as the conditional noise  $\epsilon_\phi(\mathbf{x}_k, \emptyset, k)$ , where a dummy  
 490 value  $\emptyset$  takes the place of  $\mathbf{y}$ . The perturbed noise  $\epsilon_\phi(\mathbf{x}_k, \emptyset, k) + \omega(\epsilon_\phi(\mathbf{x}_k, \mathbf{y}, k) - \epsilon_\phi(\mathbf{x}_k, \emptyset, k))$  (i.e.  
 491 *classifier-free guidance*) is used to later generate samples.

492 **Video Diffusion in Latent Space.** As diffusion models generally perform denoising in the input  
 493 space [20], the optimization and inference become computationally demanding when dealing with  
 494 high-dimensional data, such as videos. Inspired by recent works [38, 49], we first use an autoencoder  
 495  $v_{\text{enc}}$  to learn a latent space for our video data. It projects an observation trajectory  $\tau_x$  (i.e., video) into  
 496 a 2D tri-plane representation [49]  $\tau_z = [\tau_z^T, \tau_z^H, \tau_z^W]$  where  $\tau_z^T, \tau_z^H, \tau_z^W$  capture variations in the  
 497 video across time, height, and width respectively. We then diffuse over this learned latent space [49].

498 **Latent Space Video Diffusion for Visual Planning.** Our video diffusion model  $p_\phi(\tau_x^i | w_i, x_{i,1})$   
 499 generates video  $\tau_x^i$  given a language subgoal  $w_i$  and the current observation  $x_{i,1}$ . It is param-  
 500 eterized through its noise model  $\epsilon_\phi((\tau_z^i)_k, w_i, x_{i,1}, k) := \epsilon_\phi((\tau_z^i)_k, l_{\text{enc}}(w_i), v_{\text{enc}}(x_{i,1}), k)$  where  
 501  $\tau_z^i := v_{\text{enc}}(\tau_x^i)$  is the latent representation of video  $\tau_x^i$  over which we diffuse. We condition the noise  
 502 model  $\epsilon_\phi$  on subgoal  $w_i$  using a pretrained language encoder  $l_{\text{enc}}$  and on current observation  $x_{i,1}$   
 503 using video encoder  $v_{\text{enc}}$ . To use  $v_{\text{enc}}$  with a single observation  $x_{i,1}$ , we first tile the observation along  
 504 the temporal dimension to create a video.

505 **Architecture.** We now detail the architectures of different components:

- 506 • **Video Autoencoder** We borrow our architecture for  $v_{\text{enc}}$  from PVDM [49] which uses transformers  
 507 to project video  $\tau_x \in \mathbb{R}^{T \times H \times W}$  to latent codes  $\tau_z = [\tau_z^T, \tau_z^H, \tau_z^W]$  where  $\tau_z^T \in \mathbb{R}^{C \times H' \times W'}$ ,  
 508  $\tau_z^H \in \mathbb{R}^{C \times T \times W'}$ ,  $\tau_z^W \in \mathbb{R}^{C \times H' \times T}$ . Here,  $T = 50$  represents the time horizon of a video,  $H = 48$   
 509 represents video height,  $W = 64$  represents video width,  $C = 4$  represents latent codebook  
 510 dimension,  $H' = 12$  represents latent height, and  $W' = 8$  represents latent width.
- 511 • **Language Encoder** We use Flan-T5-Base [8] as the pretrained frozen language encoder  $l_{\text{enc}}$ .
- 512 • **Noise Model** We borrow PVDM-L architecture [49] which uses 2D UNet architecture, similar to  
 513 the one in Latent Diffusion Model (LDM) [38], to represent  $p(\tau_z | \tau_z')$ . In our case,  $\tau_z = v_{\text{enc}}(\tau_x^i)$   
 514 and  $\tau_z' = v_{\text{enc}}(x_{i,1})$ . To further condition noise model  $\epsilon_\phi$  on  $l_{\text{enc}}(w_i)$ , we augment the 2D UNet  
 515 Model with cross-attention mechanism borrowed by LDM [38].

516 For implementing these architectures, we used the codebase <https://github.com/sihyun-yu/PVDM>  
 517 which contains the code for PVDM and LDM.

**Classifier for Consistency between Visual Planning and Action Planning.** To ensure consistency between visual planning and action planning, we want to sample observation trajectories that maximizes both conditional observation trajectory likelihood from diffusion and the likelihood of sampled actions given the observation trajectory (see equation 4). To approximate likelihood calculation of action trajectory, we learn a binary classifier  $g_\psi$  that models if the observation trajectory leads to a high likelihood action trajectories. Since diffusion happens in latent space and we use gradients from  $g_\psi$  to bias the denoising of the video diffusion,  $g_\psi(\tau_z^i)$  takes the observation trajectory in latent space. The binary classifier  $g_\psi$  is trained to distinguish between observation trajectories in latent space sampled from video dataset  $\tau_z^i = v_{\text{enc}}(\tau_x^i)$ ,  $\tau_x^i \sim \mathcal{D}_{\text{video}}$  (i.e. label of 1) and observation trajectories in latent space sampled from video dataset whose frames where randomly shuffled  $(\tau_z^i)' = v_{\text{enc}}(\sigma(\tau_x^i))$ ,  $\tau_x^i \sim \mathcal{D}_{\text{video}}$  (i.e. label of 0). Here,  $\sigma$  denotes the random shuffling of frames. To randomly shuffle frames in an observation trajectory (of length 50), we first randomly select 5 frames in the observation trajectory. For each of the selected frame, we randomly permute it with its neighboring frame (i.e. either with the frame before it or with the frame after it). Once  $g_\psi$  is trained, we use it to bias the denoising of the video diffusion

$$\hat{\epsilon} := \epsilon_\phi((\tau_z)_k, v_{\text{enc}}(x_t), k) + \omega(\epsilon_\phi((\tau_z)_k, v_{\text{enc}}(x_t), l_{\text{enc}}(w), k) - \epsilon_\phi((\tau_z)_k, v_{\text{enc}}(x_t), k)) - \omega' \nabla_{(\tau_z)_k} \log g_\psi(1 | (\tau_z)_k)$$

Here,  $\hat{\epsilon}$  is the noise used in denoising of the video diffusion and  $\omega, \omega'$  are guidance hyperparameters.

**Classifier Architecture.** The classifier  $g_\psi(\tau_z = [\tau_z^T, \tau_z^H, \tau_z^W])$  has a ResNet-9 encoder that converts  $\tau_z^T, \tau_z^H$ , and  $\tau_z^W$  to latent vectors, then concatenate those latent vectors and passes the concatenated vector through an MLP with 2 hidden layers of sizes 256 and 128 and an output layer of size 1.

### B.3 Action Planning

To do action planning, we learn an inverse dynamics model to  $p_\psi(a_{i,t} | x_{i,t}, x_{i,t+1})$  predicts 7-dimensional robot states  $s_{i,t} = p_\psi(x_{i,t})$  and  $s_{i,t+1} = p_\psi(x_{i,t+1})$ . The first 6 dimensions of the robot state represent joint angles and the last dimension of the robot state represents the gripper state (i.e., whether it's open or closed). The first 6 action dimension is represented as joint angle difference  $a_{i,t}[:6] = s_{i,t+1}[:6] - s_{i,t}[:6]$  while the last action dimension is gripper state of next timestep  $a_{i,t}[-1] = s_{i,t+1}[-1]$ .

**Architecture.** We use ViT-B [9] (VC-1 [31] initialization) along with a linear layer to parameterize  $p_\psi$ . ViT-B projects the observation  $x_{i,t} \in \mathbb{R}^{48 \times 64 \times 3}$  to 768 dimensional latent vector from which the linear layer predicts the 7 dimensional state  $s_{i,t}$ .

## C Training and Evaluation

### C.1 Task Planning

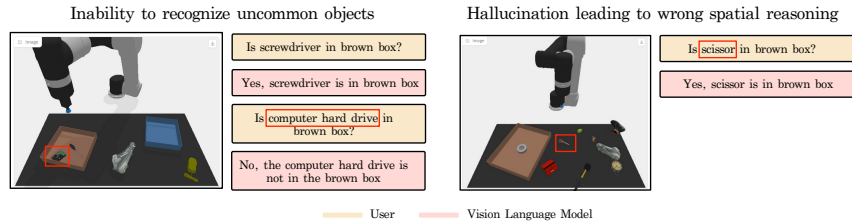

Figure 8: **Failure in VLM.** to recognize uncommon objects like computer hard drives and occasional hallucination of object presence, leading to incorrect visual reasoning.

**Training Objective and Dataset for Learned Classifier.** We use a softmax cross-entropy loss to train the multi-class classifier  $f_\phi(x_{i,1}, \{w_j\}_{j=1}^M, g)$  to classify an observation  $x_{i,1}$  into one of the  $M$  given subgoal. We train it using the classification dataset  $\mathcal{D}_{\text{classify}} := \{x_{i,1}, g, \{w_j\}_{j=1}^M, i\}$  consisting of observation  $x_{i,1}$ , goal  $g$ , candidate subgoals  $\{w_j\}_{j=1}^M$  and the correct subgoal label  $i$ . While the dataset for paint-block contains approximately 58k data points, the dataset for object-arrange consists of 82k data points.

**Vision-Language Model (VLM) as a Classifier.** We use a frozen pretrained Vision-Language Model (VLM) (MiniGPT4 [53]) as a classifier. We first sample a list of all possible subgoals  $W = \{w_i\}_{i=1}^M$  from the LLM given the language goal  $g$ . We then use the VLM to eliminate subgoals from  $W$  that have been completed. For each subgoal, we question the VLM whether that subgoal has been completed. For example, consider the subgoal "Place white block in yellow bowl". To see if the subgoal has been completed, we ask the VLM "Is there a block in yellow bowl?". Consider the subgoal "Place green block in brown box" as another example. To see if the subgoal has been completed, we ask the VLM "Is there a green block in brown box?". Furthermore, if the VLM says "yes" and the subgoal has been completed, we also remove other subgoals from  $W$  that should have been completed, such as "Place white block in green bowl". Once we have eliminated the completed subgoals, we use the domain knowledge to determine which subgoal to execute out of all the remaining subgoals. As an example, if the goal is to "Stack green block on top of blue block in brown box" and we have a green block in green bowl and a blue block in blue bowl, we should execute the subgoal "Place blue block in brown box" before the subgoal "Place green block on blue block". While this process of asking questions from VLM to determine the remaining subgoals and then sequencing the remaining subgoals doesn't require any training data, it heavily relies on the task's domain knowledge.

**Failure Modes of VLM.** We observe two common failure modes of the VLM approach in object-arrange environment and visualize them in Figure 8. First, because the model is not trained on any in-domain data, it often fails to recognize uncommon objects, such as computer hard drives, in the observations. Second, it occasionally hallucinates the presence of objects at certain locations and thus leads to incorrect visual reasoning.

**VLM as a Subgoal Predictor.** We also tried to prompt the VLM with 5 examples of goal  $g$  and subgoal candidates  $\{w_i\}_{i=1}^M$  and then directly use it to generate the next subgoal  $w_i$  given the observation  $x_{i,1}$  and the goal  $g$ . However, it completely failed. We hypothesize that the VLM fails to directly generate the next subgoal due to its inability to perform in-context learning.

**Evaluation.** We evaluate the trained classifier  $f_\phi$  and the frozen VLM for subgoal prediction accuracy on 5k unseen datapoints, consisting of observation, goal, candidate subgoals and correct subgoal, generated from test tasks  $\mathcal{T}_{\text{test}}$ . We average over 4 seeds and show the results in Figure 7.

## C.2 Visual Planning

**Ego4D dataset processing.** We pre-train on *canonical clips* of the Ego4D dataset which are text-annotated short clips made from longer videos. We further divide each canonical clip into 10sec segments from which we derive 50 frames. We resize each frame to  $48 \times 64$ . We create a pretraining Ego4D dataset of (approximately) 344k short clips, each consisting of 50 frames and a text annotation. We use the loader from R3M [33] codebase (<https://github.com/facebookresearch/r3m>) to load our pretraining Ego4D dataset.

**Training Objective and Dataset.** We use pixel-level L1 reconstruction and negative perceptual similarity for training the autoencoder  $v_{\text{enc}}$ . We borrow this objective from PVDM [49] paper except we don't use adversarial loss. We keep the language encoder frozen. We use denoising loss in video latent space  $\mathbb{E}_{k \sim [1, K], \tau_z, w, x \sim \mathcal{D}, \epsilon \sim \mathcal{N}(0, I)} [\|\epsilon - \epsilon_\phi((\tau_z)_k, l_{\text{enc}}(w), v_{\text{enc}}(x), k)\|^2]$  to train the noise model  $\epsilon_\phi$ . We replace  $w$  with a null token so that  $\epsilon_\phi$  learns both a text-conditional model and an unconditional model. We pretrain the autoencoder  $v_{\text{enc}}$  and the noise model  $\epsilon_\phi$  on the processed Ego4D dataset. We then finetune it on our dataset  $\mathcal{D}_{\text{video}} := \{\tau_x^i, w_i\}$  consisting of approximately 100k observation trajectories of length  $T = 50$  and associated text subgoals.

**Classifier Training Objective and Dataset.** We use a binary cross-entropy loss to train the binary classifier  $g_\psi(\tau_z)$  that predicts if the observation trajectory in latent space  $\tau_z = v_{\text{enc}}(\tau_x)$  leads to high-likelihood action trajectory. It is trained using trajectories from video dataset  $\tau_x \sim \mathcal{D}_{\text{video}}$ .

## C.3 Action Planning

**Training Objective and Dataset.** We train inverse dynamics  $p_\psi$  on a dataset  $\mathcal{D}_{\text{inv}}$ . Since actions are differences between robotic joint states, we train  $p_\psi$  to directly predict robotic state  $s_{i,t} = p_\psi(x_{i,t})$  by minimizing the mean squared error between the predicted robotic state and ground truth robotic

state. Hence,  $\mathcal{D}_{\text{inv}} := \{\tau_x^i, \tau_s^i\}$  consists of 1k paired observation and robotic state trajectories, each having a length of  $T = 50$ .

**Evaluation.** We evaluate the trained  $p_\psi$  (i.e., VC-1 initialized model and other related models in Figure 6) on 100 unseen paired observation and robotic state trajectories generated from test tasks  $\mathcal{T}_{\text{test}}$ . We use mean squared error to evaluate our inverse dynamics models. We use 4 seeds to calculate the standard error, represented by the shaded area in Figure 6.

## C.4 Hyperparameters

**Task Planning.** We train  $f_\phi$  for 50 epochs using AdamW optimizer [30], a batch size of 256, a learning rate of  $1e - 3$  and a weight decay of  $1e - 6$ . We used one V100 Nvidia GPU for training the multi-class classifier.

**Visual Planning.** We borrow our hyperparameters for training video diffusion from the PVDm paper [49]. We use AdamW optimizer [30], a batch size of 24 and a learning rate of  $1e - 4$  for training the autoencoder. We use AdamW optimizer, a batch size of 64, and a learning rate of  $1e - 4$  for training the noise model. During the pretraining phase with the Ego4D dataset, we train the autoencoder for 5 epochs and then the noise model for 5 epochs. During the finetuning phase with  $\mathcal{D}_{\text{video}}$ , we train the autoencoder for 10 epochs and then the noise model for 40 epochs. We used two A6000 Nvidia GPUs for training these diffusion models. We train  $g_\psi$  for 10 epochs using AdamW optimizer, a batch size of 256 and a learning rate of  $1e - 4$ . We used one V100 Nvidia GPU for training the binary classifier. During classifier-free guidance, we use  $\omega = 4$  and  $\omega' = 1$ .

**Action Planning.** We train VC-1 initialized inverse dynamics model for 20 epochs with AdamW optimizer [30], a batch size of 256 and a learning rate of  $3e - 5$ . We trained other randomly initialized ViT-B inverse dynamics models and randomly initialized ResNet-18 inverse dynamics models for 20 epochs with AdamW optimizer, a batch size of 256, and a learning rate of  $1e - 4$ . We used one V100 Nvidia GPU for training these inverse dynamics models.

## D Additional Ablation Studies

### D.1 Consistency between task planning and visual planning

To make task planning consistent with visual planning, we need to select subgoal  $w_i^*$  which maximizes the joint likelihood (see equation 3) of LLM  $p_{\text{LLM}}(w_i|g)$  and video diffusion  $p_\phi(\tau_x^i|w_i, x_{i,1})$ . While generating videos for different subgoal candidates  $w_i$  and calculating the likelihood of the generated video is computationally expensive, we would still like to evaluate its performance in subgoal prediction given it is theoretically grounded. To this end, we first sample  $M$  subgoals  $W = \{w_j\}_{j=1}^M$  from the LLM. Then, we calculate  $w_i^* = \arg \max_{w \in W} \log p_\phi(\tau_x^i|w, x_{i,1})$  and use  $w_i^*$  as our predicted subgoal. Since  $\log p_\phi(\tau_x^i|w, x_{i,1})$  is intractable, we estimate its variational lower-bound as an approximation. We use this approach for subgoal prediction in paint-block environment and compare its performance to that of the learned classifier. It achieves a subgoal prediction accuracy of  $54.3 \pm 7.2\%$  whereas the learned classifier achieves a subgoal prediction accuracy of  $98.2 \pm 1.5\%$  in paint-block environment. Both approaches outperform the approach of randomly selecting a subgoal from  $W$  (i.e., no task plan refinement), which yields a subgoal prediction accuracy of 16.67% given  $M = 6$ . The poor performance of the described approach could result from the fact that the diffusion model only coarsely approximates the true distribution  $p(\tau_x^i|w_i, x_{i,1})$ , which results in loose variational lower-bound and thus uncalibrated likelihoods from the diffusion model. A larger diffusion model could better approximate  $p(\tau_x^i|w_i, x_{i,1})$ , resulting in tighter variational lower-bound and better-calibrated likelihoods.

### D.2 Consistency between visual planning and action planning

To make visual planning consistent with action planning, we need to select observation trajectory  $(\tau_x^i)^*$  which maximizes joint likelihood (see equation 4) of conditional video diffusion  $p_\phi(\tau_x^i|w_i, x_{i,1})$  and inverse model  $\prod_{t=1}^{T-1} p_\psi(a_{i,t}|x_{i,t}, x_{i,t+1})$ . While sampling action trajectories and calculating their likelihoods during every step of the denoising process is computationally inefficient, we would still like to evaluate its effectiveness in visual plan refinements. However, we perform video diffusion



655 in latent space while our inverse model is in observation space. Hence, for purpose of this experiment,  
 656 we learn another inverse model  $\bar{p}_{\psi}(\tau_a^i | \tau_z^i)$  that uses a sequence model (i.e. a transformer) to produce  
 657 an action trajectory  $\tau_a^i$  given an observation trajectory in latent space  $\tau_z^i$ . We train  $\bar{p}_{\psi}$  for 20  
 658 epochs on 10k paired observation and action trajectories, each having a length of  $T = 50$ . We use  
 659 AdamW optimizer, a batch size of 256 and a learning rate of  $1e - 4$  during training. To generate an  
 660 observation trajectory that maximizes the joint likelihood, we first sample 30 observation trajectories  
 661 from video diffusion  $p_{\phi}(\tau_x^i | w_i, x_{i,1})$  conditioned on subgoal  $w_i$  and observation  $x_{i,1}$ . For each  
 662 generated observation trajectory  $\tau_x^i$ , we sample a corresponding action trajectory  $\tau_a^i$  and calculate  
 663 its corresponding log-likelihood  $\log \bar{p}_{\psi}(\tau_a^i | v_{\text{enc}}(\tau_x^i))$ . We select the observation trajectory  $\tau_x^i$  with  
 664 highest log-likelihood. Note that we only use  $\bar{p}_{\psi}$  for visual plan refinement and use  $p_{\psi}$  for action  
 665 execution to ensure fair comparison. If we use this approach for visual plan refinement with HiP, we  
 666 obtain a success rate of  $72.5 \pm 1.9$  on unseen tasks in paint-block environment. This is comparable  
 667 to the performance of HiP with visual plan refinements from learned classifier  $g_{\psi}$  which obtains a  
 668 success rate of  $72.8 \pm 1.7$  on unseen tasks in paint-block environment. In contrast, HiP without  
 669 any visual plan refinement obtains a success rate of  $71.1 \pm 1.3$  on unseen tasks in paint-block  
 670 environment. These results show that  $g_{\psi}$  serves as a good approximation for estimating whether an  
 671 observation trajectory leads to a high-likelihood action trajectory, while still being computationally  
 672 efficient.

673 **Architecture for  $\bar{p}_{\psi}$ .** We use a transformer model to represent  $\bar{p}_{\psi}(\tau_a | \tau_z = [\tau_z^T, \tau_z^H, \tau_z^W])$ . We first  
 674 use a ResNet-9 encoder to convert  $\tau_z^T$ ,  $\tau_z^H$ , and  $\tau_z^W$  to latent vectors. We then concatenate those  
 675 latent vectors and project the resulting vector to a hidden space of 64 dimension using a linear layer.  
 676 We then pass the 64 dimensional vector to a trajectory transformer model [24] which generates an  
 677 action trajectory  $\tau_a$  of length 50. The trajectory transformer uses a transformer architecture with 4  
 678 layers and 4 self-attention heads.
